# Supplementary material for: Analysis of Sociodemographic, Clinical, and Genomic Factors Associated With Breast Cancer Mortality in the Linked Surveillance, Epidemiology, and End Results and Medicare Database
Source: PubMed Central journal article supplement (PMC8556625; doi:10.1001/jamanetworkopen.2021.31020), 2021-10-29
Supplement: jamanetwopen-e2131020-s001.pdf [file jamanetwopen-e2131020-s001.pdf]

## Supplementary Online Content

Robinson TJ, Wilson LE, Marcom PK, et al. Analysis of sociodemographic, clinical, and genomic factors associated with breast cancer mortality in the linked Surveillance, Epidemiology, and End Results and Medicare database. *JAMA Netw Open*. 2021;4(10):e2131020. doi:10.1001/jamanetworkopen.2021.31020

**eTable 1.** Characteristics of SEER-Medicare Cohort by Screening Status (N = 3522)

**eTable 2.** Patient Characteristics Associated With Having a Symptomatic Tumor vs a Screening-Detected Tumor (N = 3522)

**eTable 3.** Baseline Characteristics of All Patients With Tumor Samples Passing QC and Included in Molecular Analysis (n = 130)

**eTable 4.** Patient Characteristics Associated With Having a Symptomatic Tumor vs a Screening-Detected Tumor Among Molecular Cohort Patients (n = 130)

**eFigure 1.** Diagram SEER-Medicare-RTR Linkage, Case Selection, and Tumor Retrieval

**eFigure 2.** Proportion of Screen-Detected Tumors by Year of Diagnosis (N = 3522)

**eAppendix.** Gene Expression Data and Survival Analyses

This supplementary material has been provided by the authors to give readers additional information about their work.

**eTable 1.** Characteristics of SEER-Medicare Cohort by Screening Status (N = 3522)

| Variable               | Screen-detected | Symptomatic  | p-value          |
|------------------------|-----------------|--------------|------------------|
| N                      | 1,555           | 1,967        |                  |
| <b>Characteristics</b> |                 |              |                  |
| Age                    |                 |              | 0.287            |
| 66-70                  | 703 (45.2)      | 854 (43.4)   |                  |
| 71-75                  | 852 (54.8)      | 1,113 (56.6) |                  |
| Detailed Race          |                 |              | <b>0.022</b>     |
| Black                  | <11             | <11          |                  |
| East Asian             | 176 (11.3)      | 162 (8.2)    |                  |
| Native Hawaiian        | 26 (1.7)        | 46 (2.3)     |                  |
| Other/Unknown          | >15             | >25          |                  |
| White                  | 1,328 (85.4)    | 1,721 (87.5) |                  |
| Stage at diagnosis     |                 |              | <b>&lt;0.001</b> |
| I                      | 1,120 (72.0)    | 1,059 (53.8) |                  |
| II                     | 421 (27.1)      | 863 (43.9)   |                  |
| III                    | 14 (0.9)        | 45 (2.3)     |                  |
| N Stage                |                 |              | <b>&lt;0.001</b> |
| N0                     | 1,265 (81.3)    | 1,427 (72.5) |                  |
| N1                     | 276 (17.7)      | 495 (25.2)   |                  |
| N2+                    | 14 (1.0)        | 45 (2.3)     |                  |
| SEER Registry          |                 |              | 0.125            |
| Hawaii                 | 281 (18.1)      | 317 (16.1)   |                  |
| Iowa                   | 1,274 (81.9)    | 1,650 (83.9) |                  |
| T Stage                |                 |              | <b>&lt;0.001</b> |
| T1                     | 1,316 (84.6)    | 1,314 (66.8) |                  |
| T2                     | 239 (15.4)      | 653 (33.2)   |                  |
| Histology              |                 |              | 0.286            |
| Ductal                 | 1,253 (80.6)    | 1,621 (82.4) |                  |
| Ductal/Other           | 23 (1.5)        | 18 (0.9)     |                  |
| Lobular                | 173 (11.1)      | 197 (10.0)   |                  |
| Lobular/Ductal         | 106 (6.8)       | 131 (6.7)    |                  |
| Grade                  |                 |              | <b>&lt;0.001</b> |
| Low (1-2)              | 1,154 (74.2)    | 1,230 (62.5) |                  |
| High (3)               | 299 (19.2)      | 534 (27.1)   |                  |
| Missing                | 102 (6.6)       | 203 (10.3)   |                  |
| PR Status              |                 |              | 0.415            |
| Borderline/Negative    | 252 (16.2)      | 350 (17.8)   |                  |
| Missing                | 13 (0.8)        | 19 (1.0)     |                  |
| Positive               | 1,290 (83.0)    | 1,598 (81.2) |                  |
| Tumor size             |                 |              | <b>&lt;0.001</b> |
| 5-10 mm                | 653 (42.0)      | 486 (24.7)   |                  |
| 10-20 mm               | 658 (42.3)      | 822 (41.8)   |                  |
| 20-30 mm               | 181 (11.6)      | 457 (23.2)   |                  |
| 30+ mm                 | 63 (4.1)        | 202 (10.3)   |                  |

|                                                |              |              |                  |
|------------------------------------------------|--------------|--------------|------------------|
| Comorbidity score                              |              |              | <b>0.005</b>     |
| 0                                              | 1,045 (67.2) | 1,258 (64.0) |                  |
| 1                                              | 383 (24.6)   | 485 (24.6)   |                  |
| 2+                                             | 127 (8.2)    | 224 (11.4)   |                  |
| Hyperlipidemia                                 | 556 (35.8)   | 504 (25.6)   | <b>&lt;0.001</b> |
| Hypertension                                   | 777 (50.0)   | 855 (43.5)   | <b>&lt;0.001</b> |
| Diabetes                                       | 248 (15.9)   | 332 (16.9)   | 0.460            |
| Zip code: 4th QRTL % no HS                     | 321 (20.6)   | 567 (28.8)   | <b>&lt;0.001</b> |
| Zip code: 4th QRTL % black race                | 405 (26.0)   | 465 (23.6)   | 0.100            |
| Zip code: 4th QRTL % living below poverty line | 393 (25.3)   | 477 (24.2)   | 0.415            |
| Married                                        | 973 (62.6)   | 1,143 (58.1) | <b>0.007</b>     |
| Lives in metropolitan area                     | 801 (51.5)   | 910 (46.3)   | <b>0.002</b>     |
| Lives in rural area                            | 95 (6.1)     | 150 (7.6)    | 0.070            |
| Year of breast cancer dx                       |              |              | <b>&lt;0.001</b> |
| Before 2000                                    | 592 (38.1)   | 1,167 (59.3) |                  |
| 2000 or later                                  | 963 (61.9)   | 800 (40.7)   |                  |

**eTable 2.** Patient Characteristics Associated With Having a Symptomatic Tumor vs a Screening-Detected Tumor (N = 3522)

| Patient characteristics                               | <i>Unadjusted OR</i>     | <i>Multivariate-adjusted OR</i> |
|-------------------------------------------------------|--------------------------|---------------------------------|
| Age at dx (ref = 66-70)                               |                          |                                 |
| 71-75                                                 | 1.08 (0.94, 1.23)        | 1.05 (0.91, 1.21)               |
| Stage at diagnosis (ref=II)                           |                          |                                 |
| I                                                     | <b>0.46 (0.40, 0.53)</b> | <b>0.47 (0.40, 0.54)</b>        |
| III                                                   | 1.57 (0.85, 2.89)        | <b>1.92 (1.03, 3.58)</b>        |
| Grade (ref=Low)                                       |                          |                                 |
| High                                                  | <b>1.68 (1.42, 1.97)</b> | <b>1.30 (1.09, 1.54)</b>        |
| Missing                                               | <b>1.87 (1.45, 2.40)</b> | <b>1.53 (1.15, 2.02)</b>        |
| Black race (ref= other than Black)                    | 1.42 (0.48, 4.26)        | -                               |
| Detailed race (ref= White)                            |                          |                                 |
| Black                                                 | 1.23 (0.40, 3.78)        | 1.19 (0.37, 3.86)               |
| East Asian                                            | <b>0.71 (0.57, 0.89)</b> | 0.80 (0.62, 1.02)               |
| Native Hawaiian                                       | 1.37 (0.84, 2.22)        | 1.50 (0.90, 2.51)               |
| Other                                                 | 1.16 (0.65, 2.05)        | 1.23 (0.67, 2.24)               |
| Comorbidity score (ref=0)                             |                          |                                 |
| 1                                                     | 1.05 (0.90, 1.23)        | 1.06 (0.90, 1.26)               |
| 2+                                                    | <b>1.47 (1.16, 1.85)</b> | <b>1.59 (1.24, 2.03)</b>        |
| Zip code at diagnosis                                 |                          |                                 |
| Highest quartile- black race                          | 0.88 (0.75, 1.03)        | 1.02 (0.86, 1.22)               |
| Highest quartile- did not finish high school          | <b>1.56 (1.33, 1.82)</b> | <b>1.19 (1.01, 1.42)</b>        |
| Highest quartile- household income below poverty line | 0.95 (0.81, 1.10)        | 0.91 (0.77, 1.09)               |
| Married                                               | <b>0.83 (0.72, 0.95)</b> | 0.89 (0.77, 1.03)               |
| Lives in metropolitan area                            | <b>0.81 (0.71, 0.93)</b> | 0.90 (0.76, 1.05)               |
| Lives in rural area                                   | 1.27 (0.97, 1.66)        | 1.19 (0.89, 1.59)               |
| Histology (ref=Ductal)                                |                          |                                 |
| Ductal/other                                          | 0.60 (0.33, 1.13)        | 0.87 (0.46, 1.66)               |
| Lobular                                               | 0.88 (0.71, 1.09)        | <b>0.76 (0.60, 0.98)</b>        |
| Lobular/Ductal                                        | 0.96 (0.73, 1.25)        | 1.02 (0.77, 1.35)               |
| PR Status (ref=Positive)                              |                          |                                 |
| Borderline/Negative                                   | 1.12 (0.94, 1.34)        | 1.07 (0.89, 1.29)               |
| Missing                                               | 1.18 (0.58, 2.40)        | 0.92 (0.44, 1.91)               |
| Year of diagnosis (reference=before 2000)             |                          |                                 |
| 2000 or later                                         | <b>0.42 (0.37, 0.48)</b> | <b>0.44 (0.38, 0.51)</b>        |

**eTable 3.** Baseline Characteristics of All Patients With Tumor Samples Passing QC and Included in Molecular Analysis (n = 130)

| Variable                                     | Screen-detected   | Symptomatic       | p-value          |
|----------------------------------------------|-------------------|-------------------|------------------|
| N                                            | 60                | 70                |                  |
| <u>Characteristics</u>                       |                   |                   |                  |
| Age                                          |                   |                   | <b>0.011</b>     |
| 66-70                                        | 32 (53.3)         | 22 (31.4)         |                  |
| 71-75                                        | 28 (46.7)         | 48 (68.6)         |                  |
| Race                                         |                   |                   | 0.410            |
| White                                        | 49 (81.7)         | 53 (75.7)         |                  |
| Black                                        | 0                 | 0                 |                  |
| East Asian/Native Hawaiian/Other             | 11 (18.3)         | 17 (24.3)         |                  |
| N Stage N1                                   | 50 (83.3)         | 56 (80.0)         | 0.801            |
| High histologic grade                        | 16 (26.7)         | 18 (25.7)         | 0.299            |
| SEER Registry                                |                   |                   | 0.418            |
| HI                                           | 15 (25.0)         | 22 (31.4)         |                  |
| IA                                           | 45 (75.0)         | 48 (68.6)         |                  |
| T Stage                                      |                   |                   | <b>&lt;0.001</b> |
| I                                            | 49 (81.7)         | 26 (37.1)         |                  |
| II                                           | 11 (18.3)         | 44 (62.9)         |                  |
| Histology                                    |                   |                   | 0.699            |
| Ductal and Ductal/Other                      | 46 (76.7)         | 54 (77.1)         |                  |
| Lobular and Lobular/Ductal                   | 14 (23.3)         | 16 (22.9)         |                  |
| ER Status                                    |                   |                   |                  |
| Positive                                     | 60 (100)          | 70 (100)          |                  |
| PR Status                                    |                   |                   | 0.198            |
| Borderline/Missing/Negative                  | <11               | 14 (20)           |                  |
| Positive                                     | >48               | 56 (80)           |                  |
| Tumor size                                   |                   |                   | <b>&lt;0.001</b> |
| 5-10 mm                                      | 15 (25.0)         | <11               |                  |
| 10-20 mm                                     | 34 (56.7)         | >17               |                  |
| 20+ mm                                       | 11 (18.3)         | 44 (62.8)         |                  |
| Patient zip code demographics:               |                   |                   |                  |
| % not finishing high school, Median (Q1, Q3) | 14.8 (12.6, 19.3) | 13.9 (11.2, 18.8) | 0.437            |
| % black race, Median (Q1, Q3)                | 1.0 (0.2, 2.5)    | 1.0 (0.3, 2.6)    | 0.503            |
| % living below poverty line, Median (Q1, Q3) | 10.1 (6.7, 12.6)  | 9.2 (6.0, 12.3)   | 0.719            |
| Married                                      | 36 (60.0)         | 38 (54.3)         | 0.512            |
| Lives in metropolitan area                   | 33 (55.0)         | 44 (62.8)         | 0.363            |
| Lives in rural area                          |                   |                   | 0.423            |
| No                                           | 57 (95.0)         | 64 (91.4)         |                  |
| Year of breast cancer dx                     |                   |                   | <0.001           |
| Pre-2000                                     | 19 (31.7)         | 45 (64.2)         |                  |

|                                                    |           |           |        |
|----------------------------------------------------|-----------|-----------|--------|
| 2000 or later                                      | 41 (68.3) | 25 (35.7) |        |
| Died of breast cancer within 10 years of diagnosis | 17 (28.3) | 35 (50.0) | <0.001 |
| Died of any cause within 10 years of diagnosis     | 24 (40.0) | 51 (72.9) | <0.001 |

**eTable 4.** Patient Characteristics Associated With Having a Symptomatic Tumor vs a Screening-Detected Tumor Among Molecular Cohort Patients (n = 130)

|                                         | <i>Univariable OR</i>    | <i>Multivariable OR</i>  |
|-----------------------------------------|--------------------------|--------------------------|
| Stage N2+ vs N1                         | 1.76 (0.31, 9.95)        | 1.12 (0.10, 12.3)        |
| Stage T2 vs T1                          | <b>7.54 (3.34, 17.0)</b> | <b>14.4 (4.86, 42.5)</b> |
| High grade                              | 0.95 (0.43, 2.08)        | 0.39 (0.12, 1.27)        |
| Aged 71-76 vs 66-70                     | 2.49 (1.22, 5.10)        | <b>3.27 (1.18, 9.10)</b> |
| Comorbidity Score (ref=0)               |                          |                          |
| 1                                       | 1.20 (0.48, 2.98)        | 0.56 (0.15, 2.06)        |
| 2+                                      | 0.75 (0.25, 2.24)        | 0.36 (0.07, 1.98)        |
| Patient zip code                        |                          |                          |
| Highest quartile- black race            | 1.22 (0.58, 2.55)        | 0.65 (0.22, 1.93)        |
| Highest quartile- < HS education        | 0.88 (0.40, 1.95)        | 0.48 (0.13, 1.77)        |
| Highest quartile- households in poverty | 0.82 (0.36, 1.85)        | 1.23 (0.36, 4.28)        |
| Married                                 | 0.79 (0.39, 1.59)        | 0.98 (0.37, 2.59)        |
| Lives in metro region                   | 1.38 (0.69, 2.80)        | 1.66 (0.53, 5.20)        |
| Lives in rural area                     | 1.78 (0.43, 7.45)        | 1.57 (0.18, 13.90)       |
| Hawaii Tumor Registry                   | 1.37 (0.64, 2.98)        | 1.40 (0.43, 4.59)        |
| Other race vs White*                    | 1.43 (0.61, 3.35)        | -                        |
| PR Borderline/Negative vs Positive      | 1.89 (0.71, 5.05)        | 2.23 (0.59, 8.47)        |
| Subtype Luminal B vs Luminal A          | 1.50 (0.73, 3.07)        | 1.52 (0.54, 4.25)        |
| Diagnosed in 2000 or later              | <b>0.26 (0.12, 0.53)</b> | <b>0.16 (0.06, 0.45)</b> |

\*collinear with Hawaii Tumor Registry in this set; excluded from multivariable analysis

**eFigure 1.** Diagram SEER-Medicare-RTR Linkage, Case Selection, and Tumor Retrieval

SEER-Medicare and Molecular cohort creation by application of inclusion and exclusion criteria. In order to apply inclusion/exclusion criteria that require both 1) SEER-Medicare based data (stage, part A&B coverage, etc.) and 2) tissue availability we used the following approach: **A)** SEER-RTR PIs (Hawaii and Iowa) provided the NCI a list of all SEER IDs for breast cancer patients age 65 or older for which they had tissue. **B)** NCI linked all Iowa and Hawaii SEER patients with Medicare data for any patients with Medicare enrollment and created an encrypted SEER-Medicare ID for each beneficiary, with a crosswalk file provided to each registry in order to be able to link encrypted SEER-Medicare IDs with specific SEER cases. **C)** After the encrypted SEER-Medicare data were received by the research team, our team applied inclusion/exclusion criteria and selected a subset of patients that have available tissues, stratified to ensure a roughly equal mix of patients with screening vs. non-screening detected tumors. This list included more than the number of samples we ultimately anticipated processing, as it was presumed that some banked samples might not have adequate tissue amount or quality for analysis when pulled and examined by the SEER-RTR PIs. **D)** A list of requested samples indexed by encrypted SEER-Medicare ID was sent to the NCI. **E)** The NCI provided a crosswalk file to link SEER IDs with encrypted SEER-Medicare IDs. **F)** The SEER-RTR PIs pulled corresponding samples and sent them to the research team labeled with the encrypted SEER-Medicare IDs. This approach allowed pulling samples stratified by the key independent variable of interest (screening vs. clinically detected (i.e. non-screened) cancers and avoided unnecessary and costly pulling of tumor blocks that would not be used in the final analysis.

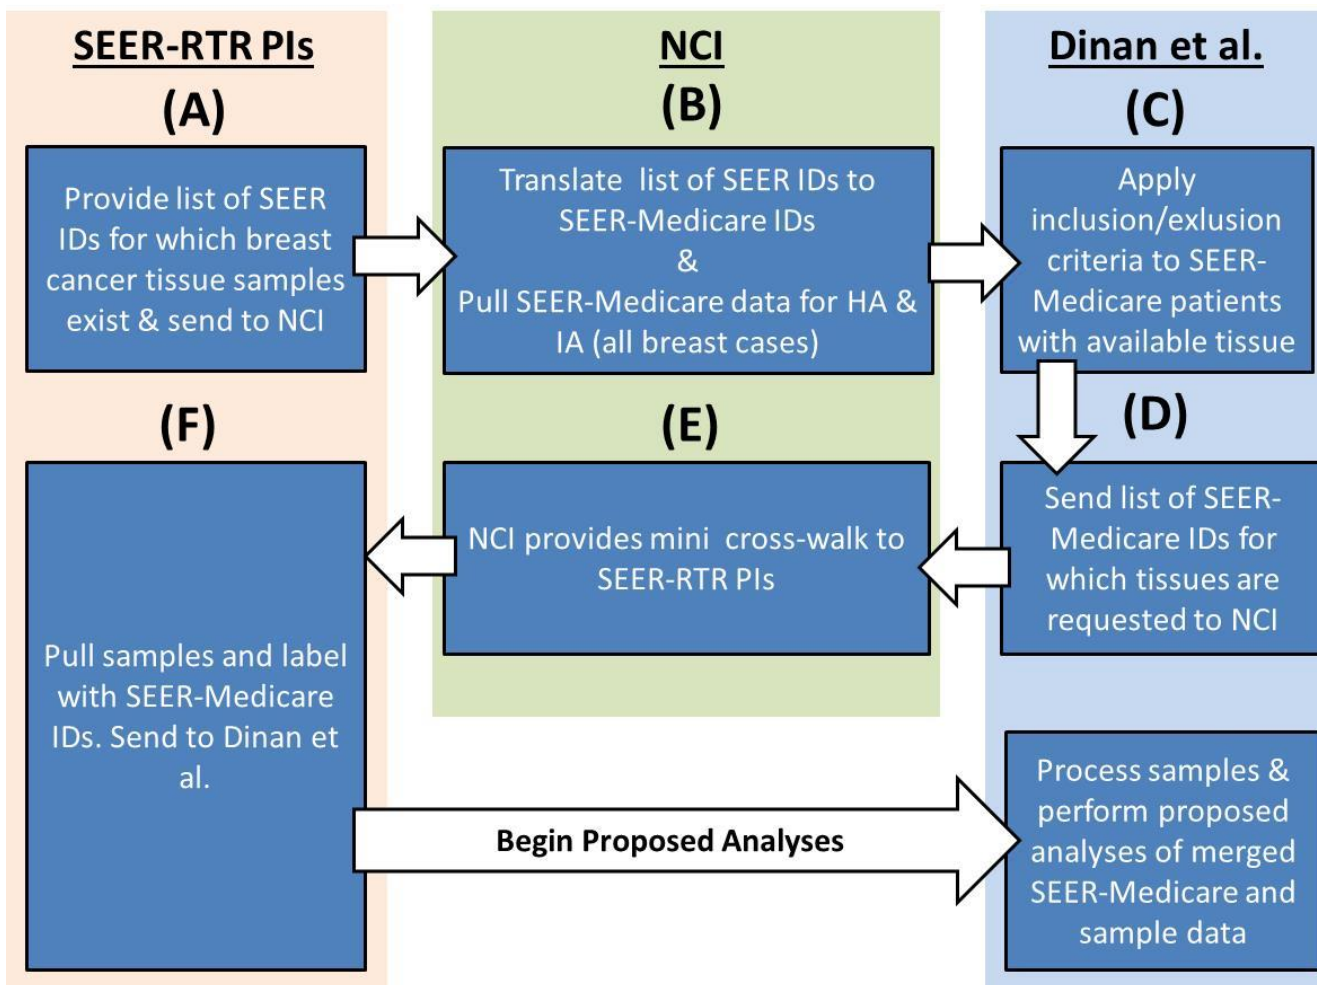



**eFigure 2.** Proportion of Screen-Detected Tumors by Year of Diagnosis (N = 3522)

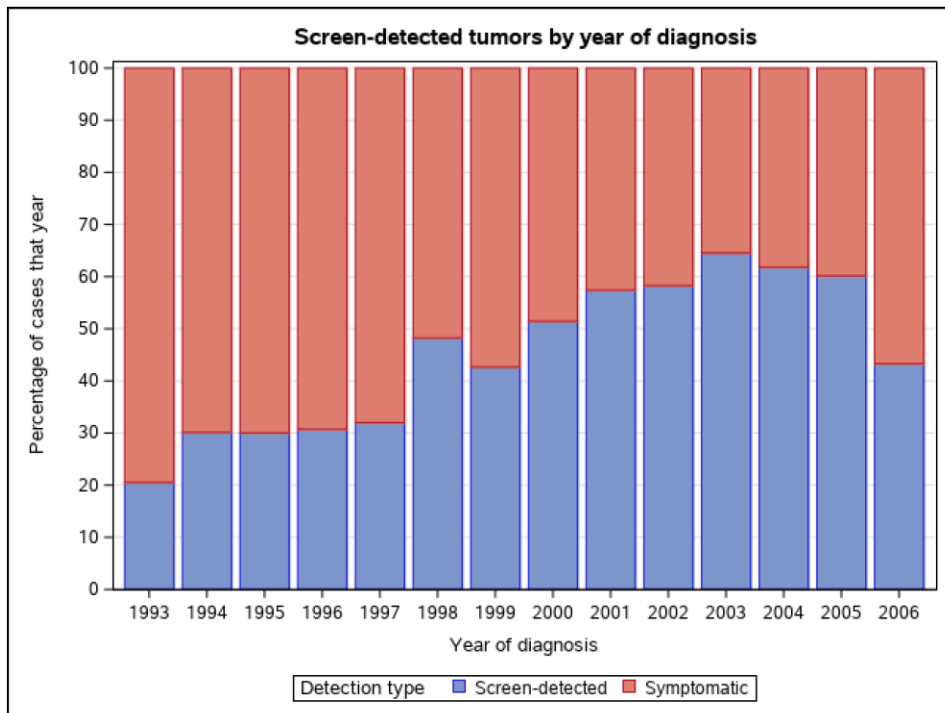

## eAppendix. Gene Expression Data and Survival Analyses

**Overall Survival** – Genes with  $p \leq 0.05$  shown for all Tables below.

**Survival Analyses (Overall Survival & Breast Cancer-Specific Survival)**: Multivariable expression analysis of genes associated with increased all-cause or breast cancer-specific mortality. Hazard ratios  $> 1$  indicate increased mortality.

### **Changes in gene expression (linear regression)**:

**Symptomatic vs. Screen-detected disease**

**N2 vs. N1-0 disease**

**T2 vs. T1 tumors**

**T2 vs. T1 limited to Luminal A tumors**

**T2 vs. T1 limited to Luminal B tumors**

**List of all genes on the Nanostring platform**: An alphabetical list of all 752 gene symbols analyzed by the Nanostring BC360 panel is provided to allow users to know the full set of genes that were investigated.

Multivariable-adjusted Cox PH regression for all-cause mortality and log-normalized gene expression

| <i>Obs</i> | <i>Estimate</i> | <i>ProbChiSq</i> | <i>HazardRatio</i> | <i>gene</i> | <i>Hochberg</i> | <i>FalseDiscoveryRate</i> |
|------------|-----------------|------------------|--------------------|-------------|-----------------|---------------------------|
| 1          | 0.3009          | 0.001            | 1.351              | AREG        | 0.7883          | 0.3975                    |
| 2          | -0.94338        | 0.0012           | 0.389              | PARP4       | 0.8891          | 0.3975                    |
| 3          | 1.26123         | 0.0016           | 3.53               | NCAPH2      | 0.998           | 0.3975                    |
| 4          | 0.80401         | 0.0025           | 2.234              | MCM2        | 0.998           | 0.4757                    |
| 5          | -0.79438        | 0.0032           | 0.452              | RBL2        | 0.998           | 0.486                     |
| 6          | 1.1461          | 0.0039           | 3.146              | PSMB7       | 0.998           | 0.49                      |
| 7          | 0.61405         | 0.0056           | 1.848              | UBE2C       | 0.998           | 0.5415                    |
| 8          | -0.44321        | 0.0058           | 0.642              | WNT2        | 0.998           | 0.5415                    |
| 9          | 0.45573         | 0.0092           | 1.577              | ALDOA       | 0.998           | 0.5984                    |

|    |          |        |       |                |       |        |
|----|----------|--------|-------|----------------|-------|--------|
| 10 | -0.52366 | 0.01   | 0.592 | AR             | 0.998 | 0.5984 |
| 11 | -0.4145  | 0.0104 | 0.661 | HLA_DOB        | 0.998 | 0.5984 |
| 12 | 0.34934  | 0.0125 | 1.418 | PKMYT1         | 0.998 | 0.5984 |
| 13 | -0.39303 | 0.0139 | 0.675 | ALDH1A1        | 0.998 | 0.5984 |
| 14 | -0.68016 | 0.0148 | 0.507 | TLR4           | 0.998 | 0.5984 |
| 15 | 1.03315  | 0.0157 | 2.81  | MCM3           | 0.998 | 0.5984 |
| 16 | 0.53722  | 0.0158 | 1.711 | CDC7           | 0.998 | 0.5984 |
| 17 | 0.47037  | 0.0158 | 1.601 | RRM2           | 0.998 | 0.5984 |
| 18 | 0.54111  | 0.0164 | 1.718 | UBE2T          | 0.998 | 0.5984 |
| 19 | 0.48087  | 0.0165 | 1.617 | TYMS           | 0.998 | 0.5984 |
| 20 | -0.67349 | 0.0167 | 0.51  | ATM            | 0.998 | 0.5984 |
| 21 | 0.50151  | 0.0185 | 1.651 | CXXC5          | 0.998 | 0.5984 |
| 22 | -0.48306 | 0.0189 | 0.617 | TUBA4A         | 0.998 | 0.5984 |
| 23 | -0.56197 | 0.0202 | 0.57  | IL6R           | 0.998 | 0.5984 |
| 24 | -0.80032 | 0.0206 | 0.449 | TAPBP          | 0.998 | 0.5984 |
| 25 | 0.29513  | 0.0215 | 1.343 | ST6GALNA<br>C2 | 0.998 | 0.5984 |
| 26 | -0.46994 | 0.022  | 0.625 | PIK3R5         | 0.998 | 0.5984 |
| 27 | -0.239   | 0.0222 | 0.787 | ZBTB16         | 0.998 | 0.5984 |
| 28 | 0.42061  | 0.0234 | 1.523 | KIFC1          | 0.998 | 0.5984 |
| 29 | -0.45293 | 0.0236 | 0.636 | PIK3CG         | 0.998 | 0.5984 |
| 30 | -0.31578 | 0.024  | 0.729 | HLA_DRA        | 0.998 | 0.5984 |
| 31 | -0.61392 | 0.0247 | 0.541 | FLI1           | 0.998 | 0.61   |
| 32 | 0.50417  | 0.0267 | 1.656 | CCNB1          | 0.998 | 0.61   |
| 33 | 0.4097   | 0.0268 | 1.506 | CDC25A         | 0.998 | 0.666  |
| 34 | -0.28751 | 0.0301 | 0.75  | IL7R           | 0.998 | 0.6811 |
| 35 | 0.34719  | 0.0319 | 1.415 | EXO1           | 0.998 | 0.6811 |
| 36 | -0.24081 | 0.033  | 0.786 | ASPN           | 0.998 | 0.6811 |
| 37 | 0.40164  | 0.0343 | 1.494 | MT1G           | 0.998 | 0.6811 |

|    |          |        |       |         |       |        |
|----|----------|--------|-------|---------|-------|--------|
| 38 | 0.28045  | 0.0344 | 1.324 | CCND1   | 0.998 | 0.6811 |
| 39 | -0.46792 | 0.0383 | 0.626 | CBLC    | 0.998 | 0.7058 |
| 40 | 0.33656  | 0.0392 | 1.4   | TTK     | 0.998 | 0.7058 |
| 41 | 0.20586  | 0.0392 | 1.229 | DUSP4   | 0.998 | 0.7058 |
| 42 | -0.48679 | 0.0408 | 0.615 | NPEPPS  | 0.998 | 0.7058 |
| 43 | -0.40428 | 0.0418 | 0.667 | HLA_DMA | 0.998 | 0.7058 |
| 44 | 0.50497  | 0.0425 | 1.657 | GRB2    | 0.998 | 0.7058 |
| 45 | -0.27047 | 0.0431 | 0.763 | FLT3    | 0.998 | 0.7058 |
| 46 | 0.3777   | 0.0439 | 1.459 | HELLS   | 0.998 | 0.7058 |
| 47 | -0.24177 | 0.0462 | 0.785 | CCL3L1  | 0.998 | 0.7058 |
| 48 | 0.17817  | 0.0463 | 1.195 | FGFR4   | 0.998 | 0.7058 |
| 49 | -0.39093 | 0.0463 | 0.676 | BNC2    | 0.998 | 0.7058 |
| 50 | -0.25611 | 0.0469 | 0.774 | CCL4    | 0.998 | 0.7058 |
| 51 | -0.28218 | 0.048  | 0.754 | FGL2    | 0.998 | 0.7083 |
| 52 | -0.3843  | 0.0498 | 0.681 | HIF1A   | 0.998 | 0.7203 |

**Breast Cancer (BC) Specific Survival – Genes with  $p \leq 0.05$  shown**

| <i>Obs</i> | <i>Estimate</i> | <i>ProbChiSq</i> | <i>HazardRatio</i> | <i>gene</i> | <i>Hochberg</i> | <i>FalseDiscoveryRate</i> |
|------------|-----------------|------------------|--------------------|-------------|-----------------|---------------------------|
| 1          | 1.77738         | <.0001           | 5.914              | KIFC1       | 0.0551          | 0.0522                    |
| 2          | 1.87014         | 0.0001           | 6.489              | FAM83D      | 0.1042          | 0.0522                    |
| 3          | 1.80857         | 0.0003           | 6.102              | UBE2C       | 0.2343          | 0.0625                    |
| 4          | 1.31367         | 0.0004           | 3.72               | CLDN4       | 0.3066          | 0.0625                    |
| 5          | 1.75            | 0.0004           | 5.755              | GRB7        | 0.311           | 0.0625                    |
| 6          | 0.95237         | 0.0009           | 2.592              | PKMYT1      | 0.6714          | 0.1005                    |
| 7          | 1.42166         | 0.001            | 4.144              | POLQ        | 0.7772          | 0.1005                    |
| 8          | 1.57382         | 0.0011           | 4.825              | RRM2        | 0.7964          | 0.1005                    |
| 9          | 0.63664         | 0.0015           | 1.89               | ZIC2        | 0.9995          | 0.1253                    |
| 10         | 0.82158         | 0.0017           | 2.274              | MYBL2       | 0.9995          | 0.1253                    |
| 11         | 0.99747         | 0.0018           | 2.711              | FOXM1       | 0.9995          | 0.1253                    |
| 12         | 1.06974         | 0.0022           | 2.915              | NSD3        | 0.9995          | 0.1282                    |
| 13         | 1.64817         | 0.0022           | 5.197              | MCM2        | 0.9995          | 0.1282                    |
| 14         | -1.3627         | 0.0024           | 0.256              | MSR1        | 0.9995          | 0.1282                    |
| 15         | 1.85766         | 0.0029           | 6.409              | CCNB1       | 0.9995          | 0.1413                    |
| 16         | 1.02994         | 0.0034           | 2.801              | CEP55       | 0.9995          | 0.1413                    |
| 17         | 1.13513         | 0.0036           | 3.112              | RAD51       | 0.9995          | 0.1413                    |
| 18         | 0.89656         | 0.0039           | 2.451              | CDC25C      | 0.9995          | 0.1413                    |
| 19         | -1.60656        | 0.0039           | 0.201              | PARP4       | 0.9995          | 0.1413                    |
| 20         | 1.29396         | 0.0039           | 3.647              | TOP2A       | 0.9995          | 0.1413                    |
| 21         | 1.36824         | 0.0039           | 3.928              | BAIAP2L1    | 0.9995          | 0.1413                    |
| 22         | 0.92504         | 0.0046           | 2.522              | TTK         | 0.9995          | 0.1523                    |
| 23         | 0.7774          | 0.0051           | 2.176              | EXO1        | 0.9995          | 0.1523                    |
| 24         | 1.56106         | 0.0053           | 4.764              | HIST1H1C    | 0.9995          | 0.1523                    |
| 25         | 0.89081         | 0.0057           | 2.437              | E2F1        | 0.9995          | 0.1523                    |
| 26         | 0.94697         | 0.0058           | 2.578              | ESPL1       | 0.9995          | 0.1523                    |

|    |          |        |       |           |        |        |
|----|----------|--------|-------|-----------|--------|--------|
| 27 | 0.9089   | 0.0063 | 2.482 | ORC6      | 0.9995 | 0.1523 |
| 28 | 1.02729  | 0.0063 | 2.793 | AURKA     | 0.9995 | 0.1523 |
| 29 | 1.13542  | 0.0065 | 3.112 | MKI67     | 0.9995 | 0.1523 |
| 30 | -0.81176 | 0.0065 | 0.444 | SFRP2     | 0.9995 | 0.1523 |
| 31 | 0.69317  | 0.0066 | 2     | MELK      | 0.9995 | 0.1523 |
| 32 | -0.95438 | 0.0067 | 0.385 | FAP       | 0.9995 | 0.1523 |
| 33 | 1.0838   | 0.0067 | 2.956 | CXXC5     | 0.9995 | 0.1523 |
| 34 | 0.94427  | 0.007  | 2.571 | CDCA5     | 0.9995 | 0.154  |
| 35 | 1.02732  | 0.0075 | 2.794 | HMGA1     | 0.9995 | 0.1596 |
| 36 | 1.06163  | 0.0076 | 2.891 | HIST1H3H  | 0.9995 | 0.1596 |
| 37 | 1.05946  | 0.0081 | 2.885 | CDC6      | 0.9995 | 0.1652 |
| 38 | 1.84422  | 0.009  | 6.323 | NUDT1     | 0.9995 | 0.1783 |
| 39 | 0.97087  | 0.0093 | 2.64  | CDKN3     | 0.9995 | 0.18   |
| 40 | 1.11839  | 0.0101 | 3.06  | HIST1H2BH | 0.9995 | 0.1838 |
| 41 | 0.90383  | 0.0102 | 2.469 | KIF11     | 0.9995 | 0.1838 |
| 42 | 1.25001  | 0.0103 | 3.49  | RFC4      | 0.9995 | 0.1838 |
| 43 | 0.57817  | 0.0107 | 1.783 | NUF2      | 0.9995 | 0.1863 |
| 44 | 0.43716  | 0.0114 | 1.548 | FGFR4     | 0.9995 | 0.1864 |
| 45 | -0.63165 | 0.0115 | 0.532 | ASPN      | 0.9995 | 0.1864 |
| 46 | 0.95586  | 0.0116 | 2.601 | MAD2L1    | 0.9995 | 0.1864 |
| 47 | 1.00259  | 0.0116 | 2.725 | AURKB     | 0.9995 | 0.1864 |
| 48 | 0.60062  | 0.0134 | 1.823 | BIRC5     | 0.9995 | 0.2105 |
| 49 | 0.62537  | 0.0173 | 1.869 | VEGFA     | 0.9995 | 0.2563 |
| 50 | 1.08819  | 0.0174 | 2.969 | ATAD2     | 0.9995 | 0.2563 |
| 51 | 0.89788  | 0.0178 | 2.454 | RAD54L    | 0.9995 | 0.2563 |
| 52 | 1.00366  | 0.018  | 2.728 | BRCA1     | 0.9995 | 0.2563 |
| 53 | 1.94157  | 0.0184 | 6.97  | RBL1      | 0.9995 | 0.2563 |
| 54 | 1.51682  | 0.0188 | 4.558 | HDAC2     | 0.9995 | 0.2563 |

|    |          |        |       |           |        |        |
|----|----------|--------|-------|-----------|--------|--------|
| 55 | 1.23554  | 0.019  | 3.44  | MIS18A    | 0.9995 | 0.2563 |
| 56 | 1.35955  | 0.0194 | 3.894 | DDX39A    | 0.9995 | 0.2563 |
| 57 | 0.80633  | 0.0197 | 2.24  | CDC25A    | 0.9995 | 0.2563 |
| 58 | 0.90425  | 0.0198 | 2.47  | SPC25     | 0.9995 | 0.2563 |
| 59 | 0.60807  | 0.0229 | 1.837 | ELF3      | 0.9995 | 0.292  |
| 60 | 0.733    | 0.0242 | 2.081 | KIF14     | 0.9995 | 0.3011 |
| 61 | 1.13335  | 0.0246 | 3.106 | SUV39H2   | 0.9995 | 0.3011 |
| 62 | -1.43438 | 0.0248 | 0.238 | ADD1      | 0.9995 | 0.3011 |
| 63 | 0.88361  | 0.0255 | 2.42  | CENPF     | 0.9995 | 0.304  |
| 64 | 0.78402  | 0.026  | 2.19  | KIF2C     | 0.9995 | 0.3052 |
| 65 | -0.58613 | 0.0283 | 0.556 | HLA_DPB1  | 0.9995 | 0.3271 |
| 66 | 0.81839  | 0.0298 | 2.267 | ANLN      | 0.9995 | 0.3391 |
| 67 | 0.66298  | 0.0319 | 1.941 | EIF4EBP1  | 0.9995 | 0.3509 |
| 68 | 0.80687  | 0.0319 | 2.241 | NDC80     | 0.9995 | 0.3509 |
| 69 | 0.97587  | 0.0322 | 2.653 | SLC2A1    | 0.9995 | 0.3509 |
| 70 | -0.89322 | 0.0335 | 0.409 | AR        | 0.9995 | 0.3601 |
| 71 | -0.58506 | 0.0349 | 0.557 | HLA_DRA   | 0.9995 | 0.3684 |
| 72 | 0.84182  | 0.0353 | 2.321 | ID2       | 0.9995 | 0.3684 |
| 73 | -0.63214 | 0.0359 | 0.531 | ALDH1A1   | 0.9995 | 0.3697 |
| 74 | -1.43528 | 0.0368 | 0.238 | JAK1      | 0.9995 | 0.3725 |
| 75 | -0.9599  | 0.0375 | 0.383 | LRRC32    | 0.9995 | 0.3725 |
| 76 | 0.76908  | 0.0386 | 2.158 | ASPM      | 0.9995 | 0.3725 |
| 77 | 0.66593  | 0.0387 | 1.946 | POLD1     | 0.9995 | 0.3725 |
| 78 | 0.594    | 0.039  | 1.811 | NEIL3     | 0.9995 | 0.3725 |
| 79 | -0.79756 | 0.0391 | 0.45  | TUBA4A    | 0.9995 | 0.3725 |
| 80 | 0.64688  | 0.0402 | 1.91  | HIST3H2BB | 0.9995 | 0.3776 |
| 81 | 0.86112  | 0.0419 | 2.366 | CCNE2     | 0.9995 | 0.3803 |
| 82 | -0.75038 | 0.0421 | 0.472 | ITGA6     | 0.9995 | 0.3803 |

|    |          |        |       |         |        |        |
|----|----------|--------|-------|---------|--------|--------|
| 83 | 0.55359  | 0.0424 | 1.739 | EDN1    | 0.9995 | 0.3803 |
| 84 | -0.62066 | 0.0432 | 0.538 | FAM198B | 0.9995 | 0.3803 |
| 85 | 0.88908  | 0.0433 | 2.433 | UBE2T   | 0.9995 | 0.3803 |
| 86 | -0.5973  | 0.0444 | 0.55  | MMP14   | 0.9995 | 0.3803 |
| 87 | -0.41315 | 0.0447 | 0.662 | ZBTB16  | 0.9995 | 0.3803 |
| 88 | -0.45944 | 0.0447 | 0.632 | FST     | 0.9995 | 0.3803 |
| 89 | 0.91463  | 0.0451 | 2.496 | CCNA2   | 0.9995 | 0.3803 |
| 90 | -0.79166 | 0.0457 | 0.453 | COL6A3  | 0.9995 | 0.3803 |
| 91 | 0.87758  | 0.046  | 2.405 | CDC20   | 0.9995 | 0.3803 |
| 92 | -0.65998 | 0.0478 | 0.517 | TBC1D9  | 0.9995 | 0.3904 |
| 93 | -0.79405 | 0.0486 | 0.452 | JCAD    | 0.9995 | 0.3919 |
| 94 | 0.69837  | 0.0493 | 2.01  | HELLS   | 0.9995 | 0.3919 |
| 95 | 0.67327  | 0.0498 | 1.961 | BNIP3   | 0.9995 | 0.3919 |
| 96 | -0.7707  | 0.05   | 0.463 | PIK3R1  | 0.9995 | 0.3919 |



**Symptomatic vs. Screen-detected** – Genes with  $p \leq 0.05$  shown

| <i>Obs</i> | <i>Estimate</i> | <i>ProbChiSq</i> | <i>Gene</i> | <i>FDR</i> |
|------------|-----------------|------------------|-------------|------------|
| 1          | 0.38524         | 0.0032           | NUPR1       | 0.5795     |
| 2          | -0.53802        | 0.0033           | EGLN3       | 0.5795     |
| 3          | -0.3511         | 0.0059           | IL3RA       | 0.5795     |
| 4          | 0.30569         | 0.0083           | PRKDC       | 0.5795     |
| 5          | -0.28429        | 0.0086           | ZEB2        | 0.5795     |
| 6          | -0.2024         | 0.0123           | BORCS7      | 0.5795     |
| 7          | -0.30525        | 0.0132           | MYCT1       | 0.5795     |
| 8          | -0.49628        | 0.0138           | RELN        | 0.5795     |
| 9          | 0.32274         | 0.0138           | GRB7        | 0.5795     |
| 10         | -0.56868        | 0.0151           | NGFR        | 0.5795     |
| 11         | -0.19413        | 0.0151           | ITGB1       | 0.5795     |
| 12         | -0.57363        | 0.0158           | ABCA8       | 0.5795     |
| 13         | -0.53322        | 0.016            | PLCE1       | 0.5795     |
| 14         | -0.35187        | 0.0165           | CAV1        | 0.5795     |
| 15         | -0.70516        | 0.0171           | MMP9        | 0.5795     |
| 16         | -0.39561        | 0.0185           | MARCO       | 0.5795     |
| 17         | -0.29183        | 0.0194           | VIM         | 0.5795     |
| 18         | -0.47678        | 0.0202           | TGFB2       | 0.5795     |
| 19         | -0.40802        | 0.0207           | SCARA5      | 0.5795     |
| 20         | 0.6254          | 0.0212           | CD24        | 0.5795     |
| 21         | -0.23047        | 0.0213           | MAF         | 0.5795     |
| 22         | -0.29359        | 0.0216           | PDGFRA      | 0.5795     |
| 23         | 0.23085         | 0.0217           | FOXA1       | 0.5795     |
| 24         | -0.32478        | 0.0218           | TGFBR2      | 0.5795     |
| 25         | 0.30045         | 0.0226           | BAG1        | 0.5795     |
| 26         | -0.67423        | 0.0244           | KRT7        | 0.5795     |
| 27         | -0.44184        | 0.0251           | FHL1        | 0.5795     |
| 28         | -0.58409        | 0.0283           | LEP         | 0.5795     |
| 29         | -0.37266        | 0.0291           | LEPR        | 0.5795     |
| 30         | -0.23155        | 0.0303           | ACVRL1      | 0.5795     |
| 31         | 0.15828         | 0.0305           | ACVR1B      | 0.5795     |
| 32         | 0.23181         | 0.0306           | BBC3        | 0.5795     |
| 33         | -0.39449        | 0.031            | DCN         | 0.5795     |
| 34         | -0.27359        | 0.0323           | CD34        | 0.5795     |
| 35         | -0.31823        | 0.0328           | FSTL1       | 0.5795     |
| 36         | -0.28082        | 0.0328           | CXorf36     | 0.5795     |
| 37         | -0.3104         | 0.0343           | RAC2        | 0.5795     |
| 38         | -0.2626         | 0.0347           | MAML2       | 0.5795     |
| 39         | -0.35867        | 0.0348           | GZMH        | 0.5795     |
| 40         | -0.64975        | 0.0358           | AGR2        | 0.5795     |

|    |          |        |         |        |
|----|----------|--------|---------|--------|
| 41 | -0.24961 | 0.0377 | CCND2   | 0.5795 |
| 42 | -0.34019 | 0.0379 | PRKCB   | 0.5795 |
| 43 | -0.24066 | 0.0382 | SMO     | 0.5795 |
| 44 | -0.38023 | 0.0384 | GZMA    | 0.5795 |
| 45 | -0.32137 | 0.0385 | FGF7    | 0.5795 |
| 46 | -0.27276 | 0.0397 | JCAD    | 0.5795 |
| 47 | 0.16706  | 0.0403 | SUV39H2 | 0.5795 |
| 48 | -0.16607 | 0.0408 | ITGAV   | 0.5795 |
| 49 | -0.2618  | 0.0409 | PIK3CG  | 0.5795 |
| 50 | -0.22504 | 0.0423 | EPAS1   | 0.5795 |
| 51 | 0.22331  | 0.0427 | IFT140  | 0.5795 |
| 52 | -0.48021 | 0.0443 | ASPN    | 0.5795 |
| 53 | -0.47756 | 0.0443 | CD36    | 0.5795 |
| 54 | -0.31396 | 0.0451 | DTX1    | 0.5795 |
| 55 | -0.31331 | 0.0464 | CCL2    | 0.5795 |
| 56 | -0.33955 | 0.0467 | FGL2    | 0.5795 |
| 57 | -0.51133 | 0.0484 | SPP1    | 0.5795 |
| 58 | -0.58948 | 0.0485 | SCUBE2  | 0.5795 |
| 59 | -0.3085  | 0.049  | PPARG   | 0.5795 |
| 60 | -0.33366 | 0.0494 | CLEC5A  | 0.5795 |
| 61 | -0.32223 | 0.0497 | MMP14   | 0.5795 |
| 62 | -0.29661 | 0.0497 | FLNC    | 0.5795 |
| 63 | 0.51651  | 0.0498 | FUT3    | 0.5795 |

**N2 vs. N1-0** – Genes with  $p \leq 0.05$  shown

| <i>Obs</i> | <i>Estimate</i> | <i>ProbChiSq</i> | <i>Gene</i>        | <i>FDR</i>  |
|------------|-----------------|------------------|--------------------|-------------|
| <i>Obs</i> | <i>Estimate</i> | <i>ProbChiSq</i> | <i>HazardRatio</i> | <i>gene</i> |
| 1          | -0.66739        | 0.0002           | SMAD5              | 0.1651      |
| 2          | -0.73249        | 0.0079           | SERPINH1           | 0.9998      |
| 3          | -0.57282        | 0.0096           | PTEN               | 0.9998      |
| 4          | 1.70934         | 0.0189           | PROM1              | 0.9998      |
| 5          | 0.64057         | 0.0202           | ERBB2              | 0.9998      |
| 6          | -0.24177        | 0.0219           | PRKACA             | 0.9998      |
| 7          | -0.43885        | 0.0236           | BMPR1A             | 0.9998      |
| 8          | -0.84642        | 0.0288           | PBX3               | 0.9998      |
| 9          | -0.66526        | 0.0291           | NSD3               | 0.9998      |
| 10         | 0.65417         | 0.0324           | HLA_C              | 0.9998      |
| 11         | 0.60513         | 0.0401           | BLVRA              | 0.9998      |
| 12         | 1.16188         | 0.0426           | SLPI               | 0.9998      |
| 13         | -0.8085         | 0.0444           | OCLN               | 0.9998      |
| 14         | 1.17493         | 0.0445           | CKMT1A             | 0.9998      |
| 15         | 0.54845         | 0.0448           | RAC3               | 0.9998      |
| 16         | -0.7366         | 0.0466           | GTF2H2             | 0.9998      |
| 17         | 0.36365         | 0.0474           | BAD                | 0.9998      |
| 18         | -0.43461        | 0.0481           | ELK3               | 0.9998      |

**T2 vs. T1 – Genes with  $p \leq 0.05$  shown**

| <i>Obs</i> | <i>Estimate</i> | <i>ProbChiSq</i> | <i>Gene</i> | <i>FDR</i> |
|------------|-----------------|------------------|-------------|------------|
| 1          | -0.53309        | <.0001           | NFATC1      | 0.0279     |
| 2          | -0.61138        | <.0001           | PIM1        | 0.0279     |
| 3          | -0.56472        | 0.0003           | DTX1        | 0.0279     |
| 4          | -0.56196        | 0.0003           | CCL2        | 0.0279     |
| 5          | -0.41531        | 0.0003           | RORA        | 0.0279     |
| 6          | -0.70251        | 0.0003           | FHL1        | 0.0279     |
| 7          | -0.45303        | 0.0004           | PIK3CG      | 0.0279     |
| 8          | -0.60237        | 0.0004           | LEPR        | 0.0279     |
| 9          | -0.32853        | 0.0004           | ELK3        | 0.0279     |
| 10         | -0.49502        | 0.0004           | SPRY2       | 0.0279     |
| 11         | -0.81859        | 0.0005           | NGFR        | 0.0279     |
| 12         | -0.55592        | 0.0005           | FOSL1       | 0.0279     |
| 13         | -0.49395        | 0.0005           | ICAM1       | 0.0279     |
| 14         | -0.35242        | 0.0005           | PSMB10      | 0.0283     |
| 15         | -0.90901        | 0.0006           | LEP         | 0.0307     |
| 16         | -0.48407        | 0.0007           | RUNX3       | 0.031      |
| 17         | -0.67117        | 0.0007           | CRYAB       | 0.031      |
| 18         | -0.44188        | 0.0008           | CXorf36     | 0.0314     |
| 19         | -0.51666        | 0.0009           | PPARG       | 0.0357     |
| 20         | -0.78543        | 0.0009           | ABCA8       | 0.0357     |
| 21         | -0.80347        | 0.001            | THBS4       | 0.037      |
| 22         | -0.58951        | 0.0011           | IGF1        | 0.037      |
| 23         | 0.32002         | 0.0012           | HDAC2       | 0.037      |
| 24         | -0.37565        | 0.0013           | CDC14B      | 0.037      |
| 25         | -0.39179        | 0.0013           | PIK3CD      | 0.037      |
| 26         | -0.38603        | 0.0013           | CCND2       | 0.037      |
| 27         | 0.43649         | 0.0015           | CCNB1       | 0.0371     |
| 28         | -0.66585        | 0.0016           | F3          | 0.0371     |
| 29         | -0.54935        | 0.0016           | EGFR        | 0.0371     |
| 30         | -0.6706         | 0.0016           | LPL         | 0.0371     |
| 31         | -0.43957        | 0.0017           | ID1         | 0.0371     |
| 32         | -0.53283        | 0.0017           | GZMH        | 0.0371     |
| 33         | -0.46093        | 0.0017           | CAV1        | 0.0371     |
| 34         | -0.56416        | 0.0017           | SOCS3       | 0.0371     |
| 35         | -0.38133        | 0.0017           | CDH5        | 0.0371     |
| 36         | -0.65904        | 0.0018           | CACNA1D     | 0.0376     |
| 37         | -0.59356        | 0.0019           | IL1B        | 0.0389     |
| 38         | -0.47797        | 0.002            | BCL2A1      | 0.0403     |
| 39         | -0.32229        | 0.0022           | HLA_E       | 0.0418     |
| 40         | -0.37134        | 0.0022           | CBLC        | 0.0418     |

|    |          |        |           |        |
|----|----------|--------|-----------|--------|
| 41 | -0.33055 | 0.0024 | ZEB2      | 0.0424 |
| 42 | -0.60253 | 0.0025 | CACNA2D3  | 0.0424 |
| 43 | -0.49021 | 0.0025 | TWIST2    | 0.0424 |
| 44 | -0.45629 | 0.0025 | FLNC      | 0.0424 |
| 45 | 0.36095  | 0.0025 | ALDOA     | 0.0424 |
| 46 | -0.38224 | 0.0028 | LRRC32    | 0.0452 |
| 47 | -0.54292 | 0.0029 | COL27A1   | 0.0463 |
| 48 | -0.4854  | 0.003  | TGFB3     | 0.0474 |
| 49 | -0.49802 | 0.0035 | TSPAN7    | 0.053  |
| 50 | -0.30149 | 0.0035 | PLD1      | 0.053  |
| 51 | -0.40602 | 0.0037 | S1PR1     | 0.0538 |
| 52 | -0.68332 | 0.0041 | CD36      | 0.0538 |
| 53 | -0.31768 | 0.0041 | PECAM1    | 0.0538 |
| 54 | -0.44288 | 0.0041 | ITGB3     | 0.0538 |
| 55 | -0.32579 | 0.0041 | PIK3R1    | 0.0538 |
| 56 | 0.4907   | 0.0042 | HIST3H2BB | 0.0538 |
| 57 | -0.42438 | 0.0043 | CXCL12    | 0.0538 |
| 58 | -0.3537  | 0.0043 | MYCT1     | 0.0538 |
| 59 | -0.52145 | 0.0043 | PTGS2     | 0.0538 |
| 60 | -0.53059 | 0.0043 | MEOX2     | 0.0538 |
| 61 | -0.44651 | 0.0044 | SNAI1     | 0.0538 |
| 62 | -0.41411 | 0.0045 | JAM2      | 0.054  |
| 63 | -0.38915 | 0.0046 | SPN       | 0.054  |
| 64 | -0.78836 | 0.0047 | SFRP1     | 0.054  |
| 65 | -0.64358 | 0.0048 | IL6       | 0.054  |
| 66 | -0.499   | 0.0049 | SCARA5    | 0.054  |
| 67 | -0.28689 | 0.0049 | TGFB1     | 0.054  |
| 68 | -0.34639 | 0.0049 | MFNG      | 0.054  |
| 69 | -0.39924 | 0.005  | TGFBR2    | 0.054  |
| 70 | -0.40818 | 0.005  | IL1R2     | 0.054  |
| 71 | -0.27827 | 0.0051 | NOTCH1    | 0.0544 |
| 72 | -0.29917 | 0.0053 | ACVRL1    | 0.0551 |
| 73 | -0.36763 | 0.0054 | BNC2      | 0.0551 |
| 74 | -0.46897 | 0.0055 | MARCO     | 0.0551 |
| 75 | -0.31018 | 0.0055 | IL6R      | 0.0551 |
| 76 | -0.75035 | 0.0056 | DUSP4     | 0.0551 |
| 77 | -0.14048 | 0.0056 | SP1       | 0.0551 |
| 78 | -0.36347 | 0.0059 | PDE9A     | 0.0568 |
| 79 | -0.40547 | 0.006  | PLA2G4A   | 0.0571 |
| 80 | -0.54627 | 0.0061 | SOX17     | 0.0571 |
| 81 | -0.27175 | 0.0062 | FLI1      | 0.0578 |
| 82 | -0.54724 | 0.0063 | GPX3      | 0.0581 |
| 83 | -0.55214 | 0.0066 | CCL21     | 0.0593 |

|     |          |        |          |        |
|-----|----------|--------|----------|--------|
| 84  | 0.22304  | 0.0066 | PSMB7    | 0.0593 |
| 85  | -0.3273  | 0.0067 | ROBO4    | 0.0593 |
| 86  | -0.32814 | 0.0071 | HLA_DMB  | 0.0616 |
| 87  | -0.44584 | 0.0071 | ENPP2    | 0.0616 |
| 88  | -0.80713 | 0.0074 | KRT7     | 0.0623 |
| 89  | -0.20573 | 0.0074 | PARP2    | 0.0623 |
| 90  | -0.30183 | 0.0075 | CLEC14A  | 0.0623 |
| 91  | -0.33266 | 0.0077 | MAML2    | 0.0623 |
| 92  | 0.45277  | 0.0078 | UBE2C    | 0.0623 |
| 93  | -0.50659 | 0.0079 | CD8A     | 0.0623 |
| 94  | -0.47941 | 0.0079 | GDF5     | 0.0623 |
| 95  | -0.48167 | 0.0079 | LIF      | 0.0623 |
| 96  | -0.38172 | 0.008  | CD274    | 0.0623 |
| 97  | -0.71177 | 0.0081 | WNT11    | 0.0623 |
| 98  | 0.58424  | 0.0081 | BIRC5    | 0.0623 |
| 99  | -0.48839 | 0.0082 | SOX9     | 0.0624 |
| 100 | -0.60331 | 0.0086 | CHIT1    | 0.0648 |
| 101 | -0.4941  | 0.0088 | TNN      | 0.0655 |
| 102 | -0.30528 | 0.0089 | SMO      | 0.0655 |
| 103 | -0.40543 | 0.0091 | SRPX     | 0.0657 |
| 104 | -0.78161 | 0.0092 | SCUBE2   | 0.0657 |
| 105 | -0.44363 | 0.0093 | CLEC5A   | 0.0657 |
| 106 | -0.49266 | 0.0093 | INHBB    | 0.0657 |
| 107 | -0.39084 | 0.0093 | SOCS1    | 0.0657 |
| 108 | -0.48482 | 0.0094 | GZMB     | 0.0657 |
| 109 | -0.62719 | 0.0097 | NR4A3    | 0.0667 |
| 110 | -0.39145 | 0.01   | MLLT3    | 0.0686 |
| 111 | -0.42017 | 0.0103 | PALMD    | 0.0698 |
| 112 | -0.24644 | 0.0105 | TLR4     | 0.0705 |
| 113 | 0.23331  | 0.0106 | PCNA     | 0.0706 |
| 114 | -0.36298 | 0.0107 | TEK      | 0.0708 |
| 115 | -0.5096  | 0.0111 | WNT10A   | 0.0727 |
| 116 | -0.34022 | 0.0113 | IL10RA   | 0.0729 |
| 117 | -0.37667 | 0.0114 | EMCN     | 0.0729 |
| 118 | -0.5135  | 0.0116 | DPT      | 0.0729 |
| 119 | -0.32507 | 0.0116 | PDGFRA   | 0.0729 |
| 120 | -0.46105 | 0.0116 | CCL4     | 0.0729 |
| 121 | -0.31872 | 0.012  | PIK3R5   | 0.0747 |
| 122 | -0.67196 | 0.0121 | SERPINB5 | 0.0747 |
| 123 | -0.32679 | 0.0123 | HLA_C    | 0.0748 |
| 124 | -0.31176 | 0.0123 | DUSP6    | 0.0748 |
| 125 | -0.39487 | 0.0127 | NPR1     | 0.0764 |
| 126 | -0.63836 | 0.0129 | GABRP    | 0.0767 |

|     |          |        |          |        |
|-----|----------|--------|----------|--------|
| 127 | -0.51892 | 0.013  | WIF1     | 0.0768 |
| 128 | -0.2501  | 0.0132 | MAF      | 0.0774 |
| 129 | -0.64267 | 0.0135 | PLA2G2A  | 0.0782 |
| 130 | -0.51821 | 0.0135 | IKZF3    | 0.0782 |
| 131 | -0.33638 | 0.0137 | PRKCA    | 0.0786 |
| 132 | -0.26537 | 0.0139 | JAK2     | 0.0791 |
| 133 | -0.59506 | 0.0142 | TIMP4    | 0.0791 |
| 134 | -0.46492 | 0.0142 | IL7R     | 0.0791 |
| 135 | 0.39031  | 0.0143 | KIFC1    | 0.0791 |
| 136 | -0.45043 | 0.0143 | GPC4     | 0.0791 |
| 137 | -0.15    | 0.0144 | NCAPH2   | 0.0791 |
| 138 | -0.31432 | 0.0146 | CD34     | 0.0795 |
| 139 | -0.50282 | 0.0149 | CCL5     | 0.0802 |
| 140 | -0.51587 | 0.015  | SFRP4    | 0.0802 |
| 141 | -0.49937 | 0.0151 | NKG7     | 0.0802 |
| 142 | -1.32093 | 0.0154 | SOX10    | 0.0802 |
| 143 | -0.36175 | 0.0154 | BMP6     | 0.0802 |
| 144 | -0.28414 | 0.0154 | DDR2     | 0.0802 |
| 145 | -0.45813 | 0.0157 | LAMB3    | 0.0802 |
| 146 | -0.38586 | 0.0158 | FGF13    | 0.0802 |
| 147 | -0.44547 | 0.016  | GZMA     | 0.0802 |
| 148 | 0.15755  | 0.0161 | SKP2     | 0.0802 |
| 149 | -0.34969 | 0.0161 | BMP2     | 0.0802 |
| 150 | -0.24541 | 0.0162 | KAT2B    | 0.0802 |
| 151 | -0.34353 | 0.0163 | SHE      | 0.0802 |
| 152 | -0.32973 | 0.0164 | EDNRB    | 0.0802 |
| 153 | -0.43929 | 0.0165 | CXCL8    | 0.0802 |
| 154 | -0.43042 | 0.0165 | CD8B     | 0.0802 |
| 155 | 0.43408  | 0.0166 | TOP2A    | 0.0802 |
| 156 | -0.3772  | 0.0166 | JAK3     | 0.0802 |
| 157 | -0.55923 | 0.0171 | LAMC2    | 0.082  |
| 158 | -0.53286 | 0.0173 | SELE     | 0.0823 |
| 159 | -0.3454  | 0.0174 | CACNA2D1 | 0.0823 |
| 160 | -0.49152 | 0.0176 | ID4      | 0.0825 |
| 161 | -0.36375 | 0.0178 | CCR1     | 0.0828 |
| 162 | -0.37841 | 0.0179 | ALDH1A1  | 0.0828 |
| 163 | -0.482   | 0.0179 | VIT      | 0.0828 |
| 164 | 0.38122  | 0.0191 | FAM83D   | 0.0874 |
| 165 | -0.27726 | 0.0193 | IL4R     | 0.0881 |
| 166 | -0.44978 | 0.0199 | TMPRSS2  | 0.09   |
| 167 | -0.43004 | 0.0204 | KLRK1    | 0.0917 |
| 168 | -0.39013 | 0.0205 | FZD10    | 0.092  |
| 169 | -0.36398 | 0.0208 | TNFAIP6  | 0.0922 |

|     |          |        |           |        |
|-----|----------|--------|-----------|--------|
| 170 | -0.44145 | 0.0209 | ITGB6     | 0.0922 |
| 171 | -0.34845 | 0.021  | FOXC1     | 0.0922 |
| 172 | 0.69382  | 0.0214 | SIX1      | 0.0936 |
| 173 | -0.28113 | 0.0215 | CYBB      | 0.0936 |
| 174 | -0.29385 | 0.022  | LIFR      | 0.095  |
| 175 | 0.27796  | 0.0224 | HIST1H2BH | 0.0964 |
| 176 | -0.44178 | 0.0229 | KCNB1     | 0.0972 |
| 177 | 0.26557  | 0.023  | RAC3      | 0.0972 |
| 178 | -0.41912 | 0.0231 | DCN       | 0.0972 |
| 179 | -0.30798 | 0.0231 | HGF       | 0.0972 |
| 180 | -0.40729 | 0.0235 | VEGFD     | 0.098  |
| 181 | 0.40819  | 0.024  | CEP55     | 0.0993 |
| 182 | -0.43345 | 0.024  | LEMD1     | 0.0993 |
| 183 | -0.3321  | 0.0242 | ZFPM2     | 0.0996 |
| 184 | -0.415   | 0.0245 | PPARGC1A  | 0.1    |
| 185 | -0.36934 | 0.0247 | HLA_DPB1  | 0.1004 |
| 186 | -0.54963 | 0.0249 | SLPI      | 0.1004 |
| 187 | -0.5077  | 0.025  | HSPA2     | 0.1004 |
| 188 | -0.43661 | 0.0251 | TMEM45B   | 0.1004 |
| 189 | -0.37118 | 0.0254 | CCR5      | 0.1009 |
| 190 | -0.38757 | 0.0261 | PDCD1     | 0.1032 |
| 191 | -0.36886 | 0.0262 | CXCR6     | 0.1032 |
| 192 | -0.37918 | 0.0276 | FGL2      | 0.1076 |
| 193 | -0.18035 | 0.0276 | ITGAV     | 0.1076 |
| 194 | -0.41173 | 0.0281 | CLDN1     | 0.1082 |
| 195 | -0.32538 | 0.0283 | ITGA6     | 0.1082 |
| 196 | 0.35806  | 0.0283 | TYMS      | 0.1082 |
| 197 | -0.80849 | 0.0283 | FGF10     | 0.1082 |
| 198 | -0.27975 | 0.0288 | BCL6B     | 0.1094 |
| 199 | 0.35072  | 0.029  | CENPF     | 0.1096 |
| 200 | -0.32484 | 0.0293 | FGF18     | 0.1103 |
| 201 | -0.35884 | 0.0297 | DTX4      | 0.1112 |
| 202 | -0.39738 | 0.0299 | CCR2      | 0.1114 |
| 203 | -0.41908 | 0.0301 | PTGER3    | 0.1115 |
| 204 | 0.18061  | 0.0305 | PIK3CA    | 0.1123 |
| 205 | -0.34325 | 0.0309 | RORB      | 0.1135 |
| 206 | -0.30999 | 0.0318 | CDKN1C    | 0.116  |
| 207 | 0.36408  | 0.0319 | CDK1      | 0.116  |
| 208 | -0.26528 | 0.0323 | DLL1      | 0.1169 |
| 209 | -0.40047 | 0.0326 | FOXC2     | 0.1173 |
| 210 | 0.17483  | 0.0336 | PIK3R2    | 0.1201 |
| 211 | -0.38761 | 0.0338 | ARNT2     | 0.1201 |
| 212 | 0.36576  | 0.034  | ESR1      | 0.1201 |



|     |          |        |          |        |
|-----|----------|--------|----------|--------|
| 213 | -0.23823 | 0.0342 | ID2      | 0.1201 |
| 214 | -0.37471 | 0.0343 | ADAM12   | 0.1201 |
| 215 | 0.34522  | 0.0343 | MKI67    | 0.1201 |
| 216 | -0.34054 | 0.0352 | HAS1     | 0.1222 |
| 217 | 0.34222  | 0.0353 | HIST1H3H | 0.1222 |
| 218 | -0.43036 | 0.0355 | IL22RA2  | 0.1226 |
| 219 | -0.41074 | 0.0358 | GADD45G  | 0.1228 |
| 220 | -0.27951 | 0.0368 | PDCD1LG2 | 0.1258 |
| 221 | -0.50215 | 0.0371 | ASPN     | 0.1258 |
| 222 | -0.3197  | 0.0375 | GRIN2A   | 0.1258 |
| 223 | -0.55426 | 0.0375 | IRX1     | 0.1258 |
| 224 | -0.43293 | 0.0375 | OGN      | 0.1258 |
| 225 | 0.23988  | 0.0378 | HIST1H1C | 0.1262 |
| 226 | -0.30275 | 0.0379 | TNF      | 0.1262 |
| 227 | -0.47462 | 0.039  | LTB      | 0.1291 |
| 228 | -0.35177 | 0.0395 | MET      | 0.1304 |
| 229 | -0.24653 | 0.0399 | HEG1     | 0.1309 |
| 230 | 0.77611  | 0.0404 | PPP2R2C  | 0.1312 |
| 231 | -0.37213 | 0.0406 | RARRES3  | 0.1312 |
| 232 | -0.45933 | 0.0406 | PLCE1    | 0.1312 |
| 233 | -0.32322 | 0.0406 | FAP      | 0.1312 |
| 234 | -0.34112 | 0.0419 | HLA_DPA1 | 0.1346 |
| 235 | 0.16882  | 0.0425 | BMPR1A   | 0.136  |
| 236 | -0.29984 | 0.0431 | RAC2     | 0.1372 |
| 237 | 0.30533  | 0.0434 | PTTG1    | 0.1376 |
| 238 | 0.4224   | 0.0439 | PKMYT1   | 0.1383 |
| 239 | -0.40088 | 0.044  | BBOX1    | 0.1383 |
| 240 | -0.32598 | 0.0442 | HLA_DRA  | 0.1386 |
| 241 | -0.2527  | 0.0457 | VIM      | 0.1423 |
| 242 | -0.509   | 0.0458 | PLA2G3   | 0.1423 |
| 243 | -0.33019 | 0.0461 | PRKCB    | 0.1427 |
| 244 | -0.29938 | 0.0464 | ECM2     | 0.1429 |
| 245 | -0.1661  | 0.0472 | PARP4    | 0.1436 |
| 246 | -0.39066 | 0.0472 | EFNA5    | 0.1436 |
| 247 | -0.38696 | 0.0473 | CCL3L1   | 0.1436 |
| 248 | -0.44233 | 0.0474 | WNT5A    | 0.1436 |
| 249 | -0.22447 | 0.0484 | HLA_DMA  | 0.1459 |
| 250 | -0.26626 | 0.0486 | ZEB1     | 0.1459 |
| 251 | -0.40267 | 0.0488 | RELN     | 0.1459 |
| 252 | -0.19591 | 0.0489 | SMAD3    | 0.1459 |
| 253 | -0.38189 | 0.0498 | TTYH1    | 0.148  |

**T2 vs. T1 limited to Luminal A tumors – Genes with  $p \leq 0.05$  shown**

| <i>Obs</i> | <i>Estimate</i> | <i>ProbChiSq</i> | <i>Gene</i> | <i>FDR</i> |
|------------|-----------------|------------------|-------------|------------|
| 1          | -0.92388        | 0.0002           | SOCS3       | 0.0706     |
| 2          | -0.92278        | 0.0003           | CXCL8       | 0.0706     |
| 3          | -0.80081        | 0.0003           | SOX9        | 0.0706     |
| 4          | 0.61725         | 0.0005           | PBX3        | 0.0852     |
| 5          | -0.73515        | 0.0008           | FOSL1       | 0.1116     |
| 6          | -0.82402        | 0.0009           | SELE        | 0.1116     |
| 7          | -0.55833        | 0.0021           | ICAM1       | 0.1746     |
| 8          | -0.75574        | 0.0021           | GZMB        | 0.1746     |
| 9          | -0.70354        | 0.0021           | PTGS2       | 0.1746     |
| 10         | -0.64701        | 0.0025           | CCL2        | 0.1746     |
| 11         | -0.19592        | 0.0032           | NCAPH2      | 0.1746     |
| 12         | -1.05219        | 0.0032           | KRT7        | 0.1746     |
| 13         | -0.61319        | 0.0032           | PIM1        | 0.1746     |
| 14         | -0.50051        | 0.0035           | NFATC1      | 0.1746     |
| 15         | -0.92743        | 0.0036           | NR4A3       | 0.1746     |
| 16         | -0.53422        | 0.0045           | TNFAIP6     | 0.1746     |
| 17         | -0.58287        | 0.0045           | SNAI1       | 0.1746     |
| 18         | -0.60182        | 0.0048           | BCL2A1      | 0.1746     |
| 19         | -0.61829        | 0.0048           | INHBB       | 0.1746     |
| 20         | -0.87846        | 0.005            | IL6         | 0.1746     |
| 21         | -0.65049        | 0.005            | GPC4        | 0.1746     |
| 22         | -0.63949        | 0.0054           | KIT         | 0.1746     |
| 23         | -0.71278        | 0.0055           | TMEM45B     | 0.1746     |
| 24         | -0.58807        | 0.0056           | TWIST2      | 0.1746     |
| 25         | -0.45174        | 0.0071           | CXCL12      | 0.2064     |
| 26         | -0.24474        | 0.0071           | BORCS7      | 0.2064     |
| 27         | -0.5138         | 0.0084           | RORB        | 0.2285     |
| 28         | -0.81887        | 0.0085           | SERPINB5    | 0.2285     |
| 29         | 0.40246         | 0.0091           | CCNB1       | 0.2301     |
| 30         | -0.59156        | 0.0092           | MARCO       | 0.2301     |
| 31         | -0.55666        | 0.0097           | CACNG1      | 0.2347     |
| 32         | -0.58689        | 0.0112           | TMPRSS2     | 0.2641     |
| 33         | -0.46916        | 0.0126           | PLA2G4A     | 0.2712     |
| 34         | -0.70765        | 0.0126           | HSPA2       | 0.2712     |
| 35         | -0.56931        | 0.0134           | PPARGC1A    | 0.2712     |
| 36         | -0.63463        | 0.0139           | SOX17       | 0.2712     |
| 37         | -0.45456        | 0.0139           | SYTL4       | 0.2712     |
| 38         | -0.44563        | 0.0142           | CD274       | 0.2712     |
| 39         | -0.35289        | 0.0146           | SMO         | 0.2712     |
| 40         | -0.38857        | 0.0148           | SPRY2       | 0.2712     |

|    |          |        |          |        |
|----|----------|--------|----------|--------|
| 41 | -0.56854 | 0.0148 | LIF      | 0.2712 |
| 42 | -0.21923 | 0.0153 | EIF4E2   | 0.2712 |
| 43 | -0.54521 | 0.0159 | LAMB3    | 0.2712 |
| 44 | -0.5159  | 0.0163 | PDCD1    | 0.2712 |
| 45 | 0.30529  | 0.0167 | HDAC2    | 0.2712 |
| 46 | -0.39568 | 0.0169 | PDE9A    | 0.2712 |
| 47 | -0.24049 | 0.017  | PARP2    | 0.2712 |
| 48 | -0.7818  | 0.0175 | WNT11    | 0.2712 |
| 49 | -0.74101 | 0.0179 | SLPI     | 0.2712 |
| 50 | -0.34412 | 0.018  | IL4R     | 0.2712 |
| 51 | -0.48445 | 0.0185 | SOCS1    | 0.2722 |
| 52 | -0.48064 | 0.0191 | HAS1     | 0.2766 |
| 53 | -0.63191 | 0.0206 | CACNA2D3 | 0.2909 |
| 54 | -0.24916 | 0.0209 | DDX39A   | 0.2909 |
| 55 | -0.52533 | 0.0214 | IL1RN    | 0.2925 |
| 56 | -0.5141  | 0.0219 | CCR1     | 0.2942 |
| 57 | -0.3393  | 0.0252 | ID2      | 0.3324 |
| 58 | -0.7231  | 0.0263 | KRT17    | 0.3324 |
| 59 | -0.58499 | 0.0267 | CCNA1    | 0.3324 |
| 60 | -0.44901 | 0.0277 | LEPR     | 0.3324 |
| 61 | -0.5046  | 0.0278 | TNN      | 0.3324 |
| 62 | -0.43673 | 0.0279 | EGFR     | 0.3324 |
| 63 | -0.57117 | 0.0285 | LAD1     | 0.3324 |
| 64 | -0.5079  | 0.0287 | DKK1     | 0.3324 |
| 65 | -0.60124 | 0.0291 | IL22RA2  | 0.3324 |
| 66 | -0.51483 | 0.0292 | PTGER3   | 0.3324 |
| 67 | -0.83724 | 0.0308 | CHAD     | 0.3447 |
| 68 | -0.48802 | 0.0312 | CLEC5A   | 0.3447 |
| 69 | -0.42656 | 0.0325 | DTX1     | 0.3509 |
| 70 | -0.38309 | 0.0331 | FOXC1    | 0.3509 |
| 71 | 0.28737  | 0.0331 | CDKN1B   | 0.3509 |
| 72 | -0.48263 | 0.0337 | GDF5     | 0.3521 |
| 73 | -0.63647 | 0.0362 | GABRP    | 0.3725 |
| 74 | 0.17318  | 0.0374 | SKP2     | 0.3805 |
| 75 | 0.25383  | 0.0388 | PTEN     | 0.3862 |
| 76 | -0.44387 | 0.039  | PPARG    | 0.3862 |
| 77 | -0.58527 | 0.0395 | WNT5A    | 0.3862 |
| 78 | -0.5371  | 0.0409 | LEMD1    | 0.3929 |
| 79 | -0.51071 | 0.0413 | BBOX1    | 0.3929 |
| 80 | -0.41605 | 0.0419 | PLCB4    | 0.3936 |
| 81 | 0.21902  | 0.044  | SKP1     | 0.4074 |
| 82 | 0.69943  | 0.0449 | DNAJC12  | 0.4074 |
| 83 | -0.30025 | 0.0457 | MYCT1    | 0.4074 |

|    |          |        |         |        |
|----|----------|--------|---------|--------|
| 84 | -0.63464 | 0.0464 | NR4A1   | 0.4074 |
| 85 | -0.52554 | 0.0466 | GADD45G | 0.4074 |
| 86 | -0.41496 | 0.0466 | TNF     | 0.4074 |
| 87 | -0.50466 | 0.0473 | FHL1    | 0.4085 |
| 88 | -0.34918 | 0.0483 | FZD9    | 0.4124 |

**T2 vs. T1 limited to Luminal B tumors – Genes with  $p \leq 0.05$  shown**

| <i>Obs</i> | <i>Estimate</i> | <i>ProbChiSq</i> | <i>Gene</i> | <i>FDR</i> |
|------------|-----------------|------------------|-------------|------------|
| 1          | -0.95083        | 0.0005           | HLA_DPA1    | 0.1324     |
| 2          | -0.65546        | 0.0007           | CYBB        | 0.1324     |
| 3          | -0.89046        | 0.0008           | HLA_DPB1    | 0.1324     |
| 4          | -0.56965        | 0.0012           | FLI1        | 0.1324     |
| 5          | -0.58995        | 0.0013           | KAT2B       | 0.1324     |
| 6          | -0.71312        | 0.0016           | RORA        | 0.1324     |
| 7          | -1.01917        | 0.0018           | GPX3        | 0.1324     |
| 8          | -0.52235        | 0.0019           | ELK3        | 0.1324     |
| 9          | 0.7043          | 0.0022           | RAC3        | 0.1324     |
| 10         | -0.70144        | 0.0024           | HLA_DRA     | 0.1324     |
| 11         | -0.52006        | 0.0026           | PECAM1      | 0.1324     |
| 12         | -0.58599        | 0.0027           | CD84        | 0.1324     |
| 13         | -0.5996         | 0.0028           | PIK3CG      | 0.1324     |
| 14         | -0.66377        | 0.0029           | RUNX3       | 0.1324     |
| 15         | -0.54271        | 0.003            | HLA_DMB     | 0.1324     |
| 16         | -0.52639        | 0.0032           | ZEB2        | 0.1324     |
| 17         | -0.62834        | 0.0034           | CD68        | 0.1324     |
| 18         | -0.83612        | 0.0034           | GZMH        | 0.1324     |
| 19         | -0.58239        | 0.0036           | CCND2       | 0.1324     |
| 20         | -0.53026        | 0.0037           | HLA_E       | 0.1324     |
| 21         | 2.43033         | 0.0037           | DHRS2       | 0.1324     |
| 22         | -1.12471        | 0.0046           | CACNA1D     | 0.1586     |
| 23         | -0.73102        | 0.0055           | FGL2        | 0.1814     |
| 24         | -2.09267        | 0.0058           | CEACAM5     | 0.1831     |
| 25         | -0.56171        | 0.0075           | PIK3R5      | 0.2232     |
| 26         | -0.48895        | 0.0081           | PSMB10      | 0.2232     |
| 27         | -0.39279        | 0.0082           | SMAD5       | 0.2232     |
| 28         | -0.43917        | 0.0089           | TLR4        | 0.2232     |
| 29         | -0.4195         | 0.0091           | ATM         | 0.2232     |
| 30         | -0.55892        | 0.0091           | TGFBR2      | 0.2232     |
| 31         | -0.78703        | 0.0092           | LPL         | 0.2232     |
| 32         | -0.72116        | 0.0106           | CCR2        | 0.2305     |
| 33         | -1.27924        | 0.0106           | CXCL9       | 0.2305     |
| 34         | -0.60568        | 0.0108           | RAC2        | 0.2305     |
| 35         | -0.95365        | 0.0112           | LEP         | 0.2305     |
| 36         | -0.72227        | 0.0112           | CCL3L1      | 0.2305     |
| 37         | 1.22061         | 0.0114           | SIX1        | 0.2305     |
| 38         | -1.25593        | 0.0117           | DUSP4       | 0.2305     |
| 39         | -0.42991        | 0.012            | HLA_DMA     | 0.2305     |
| 40         | 1.22563         | 0.0127           | AREG        | 0.2332     |

|    |          |        |         |        |
|----|----------|--------|---------|--------|
| 41 | -0.51381 | 0.0127 | PIK3R1  | 0.2332 |
| 42 | -0.8067  | 0.013  | CD8A    | 0.2334 |
| 43 | -0.65148 | 0.0141 | CCR5    | 0.2431 |
| 44 | 0.9666   | 0.0145 | EREG    | 0.2431 |
| 45 | -0.85347 | 0.0148 | CCL5    | 0.2431 |
| 46 | -0.40943 | 0.0149 | CD34    | 0.2431 |
| 47 | -0.48316 | 0.0157 | PRKCA   | 0.2494 |
| 48 | 0.55698  | 0.0161 | HES1    | 0.2494 |
| 49 | -0.75381 | 0.0165 | GZMA    | 0.2494 |
| 50 | -0.83981 | 0.0166 | NKG7    | 0.2494 |
| 51 | -0.38138 | 0.0169 | MAF     | 0.2497 |
| 52 | 0.25544  | 0.0186 | PALB2   | 0.2634 |
| 53 | -0.70357 | 0.0186 | HLA_B   | 0.2634 |
| 54 | -0.56569 | 0.0194 | HLA_C   | 0.2704 |
| 55 | -0.58043 | 0.0201 | CBLC    | 0.275  |
| 56 | 0.54461  | 0.0212 | ALDOA   | 0.2846 |
| 57 | -0.81171 | 0.022  | IL2RB   | 0.2901 |
| 58 | 0.84863  | 0.0233 | SOCS2   | 0.2943 |
| 59 | -0.68583 | 0.0236 | CCL4    | 0.2943 |
| 60 | -0.37947 | 0.0242 | ACVRL1  | 0.2943 |
| 61 | 0.47565  | 0.0244 | UBE2C   | 0.2943 |
| 62 | 0.46548  | 0.0247 | FAM83D  | 0.2943 |
| 63 | -0.49821 | 0.025  | SPN     | 0.2943 |
| 64 | -0.50173 | 0.0252 | MFNG    | 0.2943 |
| 65 | -0.47623 | 0.0254 | PIK3CD  | 0.2943 |
| 66 | -0.45819 | 0.026  | CAV1    | 0.2947 |
| 67 | 0.36935  | 0.0266 | SLC2A1  | 0.2947 |
| 68 | -0.77279 | 0.0266 | F3      | 0.2947 |
| 69 | 0.48818  | 0.0288 | TYMS    | 0.3139 |
| 70 | -0.46497 | 0.0293 | IL10RA  | 0.315  |
| 71 | -0.93275 | 0.0305 | HOXB3   | 0.3184 |
| 72 | -0.58278 | 0.0305 | ITGA6   | 0.3184 |
| 73 | 0.71083  | 0.0309 | BIRC5   | 0.3184 |
| 74 | 1.20579  | 0.0319 | BAMBI   | 0.3237 |
| 75 | 0.4602   | 0.0343 | E2F5    | 0.3417 |
| 76 | -0.35608 | 0.0356 | MSR1    | 0.3417 |
| 77 | -0.84039 | 0.0356 | PLA2G2A | 0.3417 |
| 78 | -0.61307 | 0.0358 | CRYAB   | 0.3417 |
| 79 | 0.4872   | 0.036  | CEP55   | 0.3417 |
| 80 | 0.30895  | 0.0364 | MAD2L1  | 0.3417 |
| 81 | -0.77988 | 0.0373 | TIGIT   | 0.3465 |
| 82 | 0.49124  | 0.0386 | BNIP3   | 0.3524 |
| 83 | -0.41096 | 0.0395 | CDC14B  | 0.3524 |

|     |          |        |           |        |
|-----|----------|--------|-----------|--------|
| 84  | -0.79515 | 0.0398 | THBS4     | 0.3524 |
| 85  | -0.50847 | 0.0398 | ENPP2     | 0.3524 |
| 86  | -0.3216  | 0.0412 | RBL2      | 0.3578 |
| 87  | -0.74399 | 0.0417 | COL27A1   | 0.3578 |
| 88  | -0.68859 | 0.0421 | RARRES3   | 0.3578 |
| 89  | -0.32187 | 0.0423 | PTEN      | 0.3578 |
| 90  | -0.50152 | 0.0434 | DTX1      | 0.3626 |
| 91  | 0.41044  | 0.0439 | AXIN2     | 0.3627 |
| 92  | -1.26982 | 0.0451 | AGTR1     | 0.3643 |
| 93  | -0.61532 | 0.046  | PSMB9     | 0.3643 |
| 94  | 0.37399  | 0.0463 | HIST1H2BH | 0.3643 |
| 95  | 0.86764  | 0.0463 | CACNG4    | 0.3643 |
| 96  | -0.57634 | 0.0473 | FHL1      | 0.3643 |
| 97  | -0.66755 | 0.0476 | WNT10A    | 0.3643 |
| 98  | 0.85601  | 0.0494 | WT1       | 0.3643 |
| 99  | 0.33127  | 0.0496 | CDC20     | 0.3643 |
| 100 | -0.40392 | 0.0498 | CMKLR1    | 0.3643 |
| 1   | -0.95083 | 0.0005 | HLA_DPA1  | 0.1324 |
| 2   | -0.65546 | 0.0007 | CYBB      | 0.1324 |
| 3   | -0.89046 | 0.0008 | HLA_DPB1  | 0.1324 |
| 4   | -0.56965 | 0.0012 | FLI1      | 0.1324 |
| 5   | -0.58995 | 0.0013 | KAT2B     | 0.1324 |
| 6   | -0.71312 | 0.0016 | RORA      | 0.1324 |
| 7   | -1.01917 | 0.0018 | GPX3      | 0.1324 |
| 8   | -0.52235 | 0.0019 | ELK3      | 0.1324 |
| 9   | 0.7043   | 0.0022 | RAC3      | 0.1324 |
| 10  | -0.70144 | 0.0024 | HLA_DRA   | 0.1324 |
| 11  | -0.52006 | 0.0026 | PECAM1    | 0.1324 |
| 12  | -0.58599 | 0.0027 | CD84      | 0.1324 |

**List of all gene symbols (N = 752) analyzed using the Nanostring BC360 panel.**

|          |          |        |         |         |          |         |           |         |
|----------|----------|--------|---------|---------|----------|---------|-----------|---------|
| ABCA8    | BCAS1    | CCL7   | CDKN1A  | CXADR   | EIF2AK3  | FHL1    | GREM1     | HLA_E   |
| ACTR3B   | BCL11A   | CCL8   | CDKN1B  | CXCL10  | EIF3B    | FLI1    | GRIA3     | HMGA1   |
| ACVR1B   | BCL2     | CCNA1  | CDKN1C  | CXCL12  | EIF4E2   | FLNC    | GRIN1     | HNF1A   |
| ACVR1C   | BCL2A1   | CCNA2  | CDKN2A  | CXCL13  | EIF4EBP1 | FLRT3   | GRIN2A    | HOXA5   |
| ACVRL1   | BCL2L1   | CCNB1  | CDKN2B  | CXCL5   | ELF3     | FLT3    | GSK3B     | HOXA7   |
| ADAM12   | BCL6B    | CCND1  | CDKN2C  | CXCL8   | ELK3     | FNBP1   | GTF2H2    | HOXA9   |
| ADCY9    | BDNF     | CCND2  | CDKN2D  | CXCL9   | ELOVL2   | FOS     | GZMA      | HOXB13  |
| ADD1     | BIRC5    | CCNE1  | CDKN3   | CXCR6   | EMCN     | FOSL1   | GZMB      | HOXB3   |
| ADM      | BLM      | CCNE2  | CEACAM5 | CXorf36 | ENO1     | FOXA1   | GZMH      | HSPA2   |
| AGR2     | BLVRA    | CCR1   | CEACAM6 | CXXC5   | ENPP2    | FOXC1   | GZMM      | IBSP    |
| AGT      | BMP2     | CCR2   | CENPF   | CYBB    | EP300    | FOXC2   | HAPLN1    | ICAM1   |
| AGTR1    | BMP4     | CCR5   | CEP55   | CYP4F3  | EPAS1    | FOXM1   | HAS1      | ID1     |
| AKT3     | BMP5     | CD163  | CFD     | DCN     | ERBB2    | FOXP3   | HBB       | ID2     |
| ALDH1A1  | BMP6     | CD19   | CHAD    | DDB2    | ERBB4    | FREM2   | HDAC1     | ID4     |
| ALDOA    | BMP7     | CD1E   | CHEK2   | DDR2    | EREG     | FST     | HDAC10    | IDO1    |
| ANGPT1   | BMP8A    | CD24   | CHI3L1  | DDX39A  | ESPL1    | FSTL1   | HDAC11    | IFT140  |
| ANLN     | BMPR1A   | CD27   | CHIT1   | DEPDC1  | ESR1     | FSTL3   | HDAC2     | IGF1    |
| ANXA9    | BMPR1B   | CD274  | CHRNA5  | DHRS2   | ETV4     | FUT3    | HDAC5     | IGF1R   |
| APH1B    | BMPR2    | CD276  | CKB     | DKK1    | ETV7     | FXYD3   | HDAC6     | IKZF3   |
| APOD     | BNC2     | CD34   | CKMT1A  | DKK2    | EXO1     | FZD10   | HDC       | IL10RA  |
| APOE     | BNIP3    | CD36   | CKS1B   | DLGAP5  | EYA1     | FZD7    | HEG1      | IL11RA  |
| AR       | BORCS7   | CD44   | CLDN1   | DLL1    | EYA2     | FZD8    | HELLS     | IL12RB2 |
| AREG     | BRCA1    | CD68   | CLDN3   | DLL3    | EYA4     | FZD9    | HEMK1     | IL13RA1 |
| ARID1A   | BRCA2    | CD84   | CLDN4   | DLL4    | F3       | GABRP   | HES1      | IL1B    |
| ARNT2    | BTG2     | CD8A   | CLDN7   | DNAJC12 | FAM124B  | GADD45A | HGF       | IL1R2   |
| ASPM     | C5orf38  | CD8B   | CLEC14A | DPT     | FAM198B  | GADD45B | HIF1A     | IL1RN   |
| ASPN     | CA12     | CDC14A | CLEC5A  | DSC2    | FAM214A  | GADD45G | HIST1H1C  | IL20RA  |
| ATAD2    | CACNA1D  | CDC14B | CMKLR1  | DTX1    | FAM83D   | GAS1    | HIST1H2BH | IL20RB  |
| ATM      | CACNA1H  | CDC20  | CNTFR   | DTX3    | FANCF    | GATA3   | HIST1H3H  | IL22RA2 |
| ATP10B   | CACNA2D1 | CDC25A | COL11A1 | DTX4    | FAP      | GATA4   | HIST3H2BB | IL24    |
| AURKA    | CACNA2D3 | CDC25B | COL27A1 | DUSP4   | FBN1     | GDF15   | HK2       | IL2RA   |
| AURKB    | CACNG1   | CDC25C | COL2A1  | DUSP6   | FGF1     | GDF5    | HLA_A     | IL2RB   |
| AXIN1    | CACNG4   | CDC6   | COL4A6  | E2F1    | FGF10    | GGH     | HLA_B     | IL3RA   |
| AXIN2    | CACNG6   | CDC7   | COL6A3  | E2F5    | FGF12    | GHR     | HLA_C     | IL4R    |
| B3GNT3   | CALML5   | CDCA5  | COL7A1  | ECM2    | FGF13    | GJB2    | HLA_DMA   | IL6     |
| BAD      | CAMK2B   | CDCA7L | COL9A3  | EDN1    | FGF18    | GLI3    | HLA_DMB   | IL6R    |
| BAG1     | CAV1     | CDCA8  | COLEC12 | EDNRB   | FGF2     | GNG4    | HLA_DOB   | IL7R    |
| BAIAP2L1 | CBLC     | CDH1   | COMP    | EFNA3   | FGF7     | GPLY    | HLA_DPA1  | INHBA   |
| BAIAP3   | CCL2     | CDH2   | CPA3    | EFNA5   | FGF9     | GPC4    | HLA_DPB1  | INHBB   |
| BAMBI    | CCL21    | CDH3   | CREBBP  | EGF     | FGFR2    | GPR160  | HLA_DQA1  | IRF6    |
| BAX      | CCL3L1   | CDH5   | CRYAB   | EGFR    | FGFR3    | GPX3    | HLA_DQB1  | IRX1    |



|          |           |        |          |          |          |            |          |        |
|----------|-----------|--------|----------|----------|----------|------------|----------|--------|
| BBC3     | CCL4      | CDK1   | CSF3R    | EGLN2    | FGFR4    | GRB2       | HLA_DRA  | ISG15  |
| BBOX1    | CCL5      | CDK6   | CTSW     | EGLN3    | FGL2     | GRB7       | HLA_DRB1 | ISM1   |
| ITGA6    | LINC02381 | MUC1   | PALB2    | POPDC3   | RBX1     | SMAD3      | TGFB3    | WEE1   |
| ITGAV    | LPL       | MUS81  | PALMD    | PPARG    | RELN     | SMAD4      | TGFB2    | WIF1   |
| ITGB1    | LRP2      | MYBL2  | PARP1    | PPARGC1A | RFC4     | SMAD5      | THBS1    | WNT10A |
| ITGB3    | LRR32     | MYC    | PARP2    | PPP2CB   | RNASE2   | SMC1B      | THBS2    | WNT11  |
| ITGB6    | LTB       | MYCN   | PARP4    | PPP2R1A  | RNF103   | SMO        | THBS4    | WNT2   |
| ITPR1    | LTBP1     | MYCT1  | PAX5     | PPP2R2C  | ROBO4    | SMURF2     | THY1     | WNT4   |
| JAG1     | MAD2L1    | NASP   | PAX8     | PRC1     | ROCK1    | SNAI1      | TIE1     | WNT5A  |
| JAG2     | MAF       | NAT1   | PBX3     | PREP     | ROCK2    | SNAI2      | TIGIT    | WNT5B  |
| JAK1     | MAML2     | NCAM1  | PCK1     | PRF1     | RORA     | SOCS1      | TIMP4    | WNT6   |
| JAK2     | MAP2K4    | NCAPH2 | PCNA     | PRKAA2   | RORB     | SOCS2      | TLE3     | WNT7B  |
| JAK3     | MAP3K12   | NDC80  | PDCD1    | PRKACA   | RPS6KA5  | SOCS3      | TLR4     | WRN    |
| JAM2     | MAPK1     | NDP    | PDCD1LG2 | PRKACB   | RPS6KB1  | SOX10      | TLX1     | WT1    |
| JCAD     | MAPK10    | NEIL1  | PDE9A    | PRKCA    | RPS6KB2  | SOX17      | TMEM45B  | XRCC2  |
| JUN      | MAPK3     | NEIL3  | PDGFB    | PRKCB    | RRM2     | SOX2       | TMPRSS2  | XRCC3  |
| KAT2B    | MAPK8IP2  | NEO1   | PDGFRA   | PRKDC    | RUNX3    | SOX9       | TMPRSS4  | ZBTB16 |
| KCNB1    | MAPT      | NETO2  | PDGFRB   | PRKX     | S100A14  | SP1        | TNF      | ZEB1   |
| KDR      | MARCO     | NFATC1 | PDK4     | PRLR     | S100A7   | SPC25      | TNFAIP6  | ZEB2   |
| KIAA0040 | MCM2      | NFKBIZ | PECAM1   | PROM1    | S1PR1    | SPDEF      | TNFSF10  | ZFPM2  |
| KIF11    | MCM3      | NGFR   | PFDN2    | PSAT1    | SCARA5   | SPN        | TNKS     | ZFYVE9 |
| KIF14    | MDM2      | NKG7   | PGK1     | PSMB10   | SCUBE2   | SPP1       | TNKS2    | ZIC2   |
| KIF23    | MED1      | NOD2   | PGR      | PSMB7    | SELE     | SPRY1      | TNN      | ZNF205 |
| KIF2C    | MELK      | NOTCH1 | PHGDH    | PSMB9    | SERBP1   | SPRY2      | TOP2A    |        |
| KIFC1    | MEOX2     | NOTCH2 | PIK3CA   | PTCH1    | SERPINB5 | SPRY4      | TP53     |        |
| KIT      | MET       | NOTCH3 | PIK3CD   | PTEN     | SERPINH1 | SRPX       | TPSAB1   |        |
| KLRK1    | MFNG      | NPEPPS | PIK3CG   | PTGDS    | SFN      | ST6GALNAC2 | TRIP13   |        |
| KRT14    | MIA       | NPR1   | PIK3R1   | PTGER3   | SFRP1    | STAT1      | TSPAN1   |        |
| KRT17    | MIS18A    | NR4A1  | PIK3R2   | PTGS2    | SFRP2    | STC1       | TSPAN7   |        |
| KRT5     | MKI67     | NR4A3  | PIK3R3   | PTTG1    | SFRP4    | SUV39H2    | TTK      |        |
| KRT6B    | MLH1      | NRCAM  | PIK3R5   | PYCARD   | SHC2     | SYTL4      | TTYH1    |        |
| KRT7     | MLLT3     | NRXN1  | PIM1     | RAC2     | SHC4     | TAP1       | TUBA4A   |        |
| LAD1     | MLPH      | NRXN3  | PIP      | RAC3     | SHE      | TAP2       | TWIST1   |        |
| LAG3     | MME       | NSD1   | PKMYT1   | RAD51    | SHMT2    | TAPBP      | TWIST2   |        |
| LAMA3    | MMP11     | NSD3   | PLA2G2A  | RAD51C   | SIDT1    | TBC1D9     | TYK2     |        |
| LAMB3    | MMP14     | NTRK2  | PLA2G3   | RAD52    | SIGIRR   | TBX1       | TYMP     |        |
| LAMC2    | MMP3      | NUDT1  | PLA2G4A  | RAD54L   | SIX1     | TCEAL1     | TYMS     |        |
| LEF1     | MMP7      | NUF2   | PLA2G4F  | RARRES3  | SKA3     | TCF4       | UBE2C    |        |
| LEFTY2   | MMP9      | NUMBL  | PLAT     | RASAL1   | SKP1     | TCF7L1     | UBE2T    |        |
| LEMD1    | MMRN2     | NUPR1  | PLCB1    | RASGRF1  | SKP2     | TEK        | VCAN     |        |
| LEP      | MRE11     | OAS3   | PLCB4    | RASGRF2  | SLC2A1   | TFDP1      | VEGFA    |        |
| LEPR     | MS4A2     | OCLN   | PLCE1    | RASGRP1  | SLC39A6  | TFF1       | VEGFD    |        |
| LFNG     | MSR1      | OGN    | PLD1     | RB1      | SLC44A4  | TFF3       | VIM      |        |

|      |      |         |       |      |       |       |       |  |
|------|------|---------|-------|------|-------|-------|-------|--|
| LIF  | MT1G | OLFML2B | POLD1 | RBL1 | SLPI  | TGFB1 | VIT   |  |
| LIFR | MTOR | ORC6    | POLQ  | RBL2 | SMAD1 | TGFB2 | WDR77 |  |
